# Supplementary material for: Electrochemical detection of tetracycline by zinc oxide modified with molecularly-imprinted polymers
Source: Royal Society of Chemistry journal article supplement (doi:10.1039/d5ay00270b), 2025-01-01
Supplement: d5ay00270b1.pdf [file d5ay00270b1.pdf]

## Electrochemical detection of tetracycline by zinc oxide modified with molecularly-imprinted polymers

Yiwei Sun, Yuting Luo, Haoxiang Wang, Yuyang He, Ruoyu Wang,  
Mengqi Lu, Dongpo Xu\*

School of Health Science and Engineering, University of Shanghai for Science and  
Technology, Shanghai 200093, PR China.

\*Corresponding author: [xudongpo@usst.edu.cn](mailto:xudongpo@usst.edu.cn)

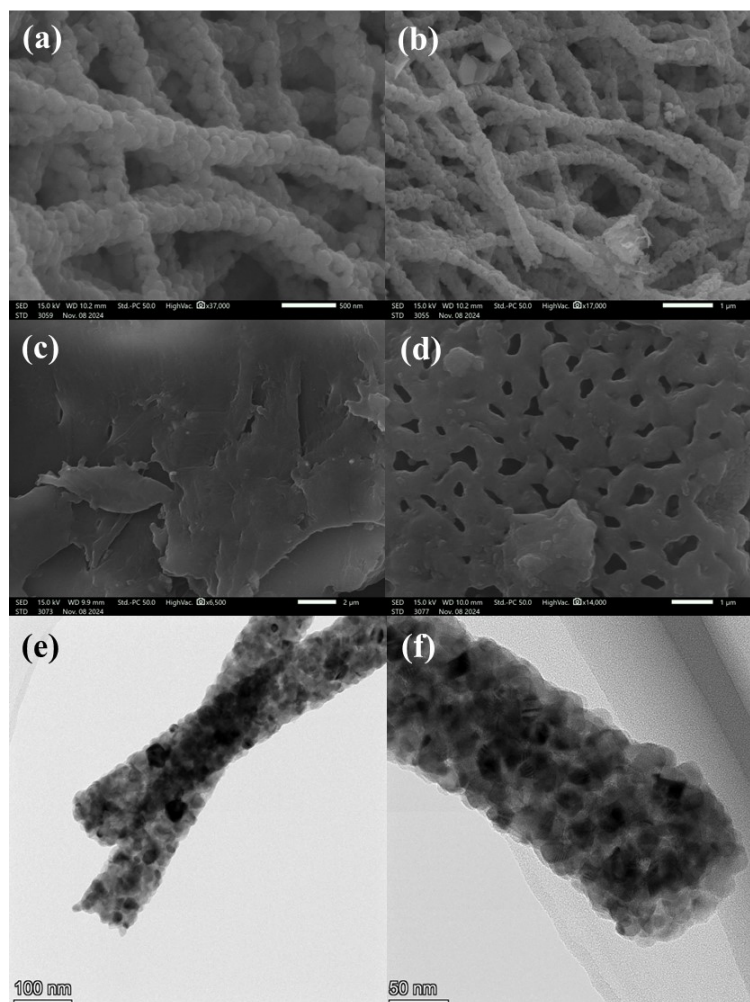

**Fig.S1.** Characterisation diagram of ZnO nanofibers. SEM images of ZnO nanofibers at 37000x (a); SEM images of ZnO nanofibers at 17000x (b); SEM images of ZnO-TC@MIP before elution (c); SEM images of ZnO-

TC@MIP after elution (d); TEM images of ZnO nanofibers at 100 nm (e);  
TEM images of ZnO nanofibers at 50 nm (f).

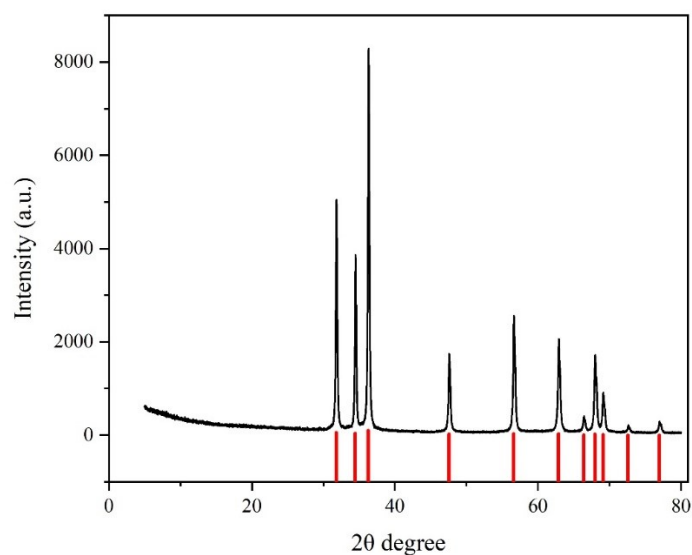

**Fig.S2.** XRD images of ZnO nanofibers

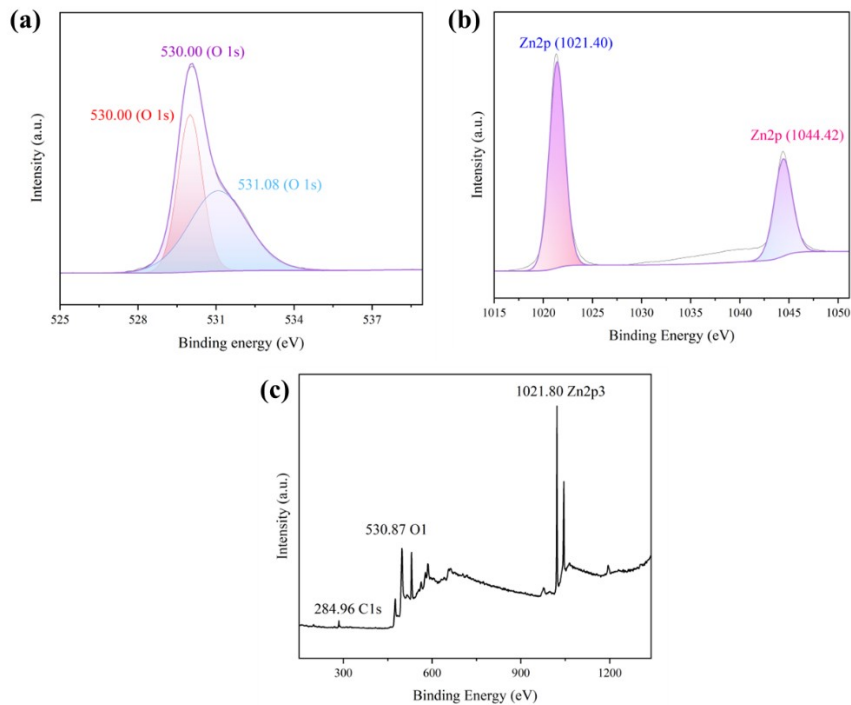

**Fig.S3** XPS images; (a)O1s, (b) Zn2p; (c) Survey spectra

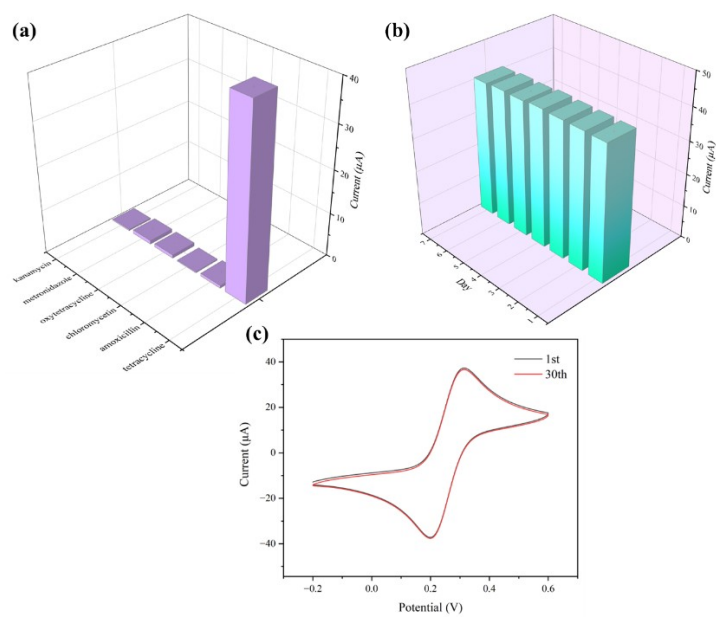

**Fig.S4.** Selectivity, repeatability, and stability of sensor ZnO@TC MIP.

(a) Selectivity; (b) repeatability; (c) stability
